# Supplementary material for: Polymorphisms in DNA mismatch repair pathway genes predict toxicity and response to cisplatin chemoradiation in head and neck squamous cell carcinoma patients
Source: PubMed Central journal article supplement (PMC6049861; doi:10.18632/oncotarget.25268), 2018-07-03
Supplement: oncotarget-09-29538-s001.pdf [file oncotarget-09-29538-s001.pdf]

## Polymorphisms in DNA mismatch repair pathway genes predict toxicity and response to cisplatin chemoradiation in head and neck squamous cell carcinoma patients

### SUPPLEMENTARY MATERIALS

Supplementary Table 1: Toxicities and responses to chemoradiotherapy in 90 patients with head and neck squamous cell carcinoma

| Variable                         | Mild, ideal                           |           | Moderate or severe, non-ideal         |           |
|----------------------------------|---------------------------------------|-----------|---------------------------------------|-----------|
|                                  | Grade of toxicity or type of response | N (%)     | Grade of toxicity or type of response | N (%)     |
| <b>Gastrointestinal toxicity</b> |                                       |           |                                       |           |
| Nausea                           | G0 + G1                               | 37 (42.0) | G2 + G3                               | 51 (58.0) |
| Vomiting                         | G0 + G1                               | 59 (67.0) | G2 + G3 + G4                          | 29 (33.0) |
| <b>Hematologic toxicity</b>      |                                       |           |                                       |           |
| Anemia                           | G0 + G1                               | 37 (44.0) | G2 + G3 + G4                          | 47 (56.0) |
| Leukopenia                       | G0 + G1                               | 47 (56.0) | G2 + G3 + G4                          | 37 (44.0) |
| Neutropenia                      | G0 + G1 + G2                          | 67 (79.8) | G3 + G4                               | 17 (20.2) |
| Lymphopenia                      | G0 + G1 + G2                          | 42 (50.0) | G3 + G4                               | 42 (50.0) |
| Thrombocytopenia                 | G0                                    | 54 (64.3) | G1 + G2 + G3 + G4                     | 30 (35.7) |
| <b>Nephrotoxicity</b>            | G0 + G1                               | 36 (52.2) | G2 + G3 + G4 + G5                     | 33 (47.8) |
| <b>Ototoxicity</b>               | G0 + G1                               | 36 (51.4) | G2 + G3 + G4                          | 34 (48.6) |
| <b>Response rate</b>             | CR + PR                               | 68 (93.2) | SD                                    | 5 (6.8)   |
|                                  | CR                                    | 15 (20.5) | PR + SD                               | 58 (79.5) |

N: number of patients; G: grade of toxicity; CR: complete response; PR: partial response; SD: stable disease. Toxicities and responses to chemoradiation were classified using the Common Terminology Criteria for Adverse Events of the National Cancer Institute and RECIST guideline, respectively. The total number of patients analyzed in distinct variables differed from the total quoted in study ( $N = 90$ ) because it was not possible to obtain consistent information about nausea, vomiting, hematologic exams, glomerular filtration rate, audiometry test or response rate after chemoradiotherapy in some cases.

Supplementary Table 2: *MLH1*, *MSH2*, *MSH3* and *EXO1* single nucleotide polymorphism genotypes and haplotypes in 90 head and neck squamous cell carcinoma patients stratified by nausea, vomiting, hematologic toxicities to chemoradiotherapy and urinary cisplatin. See Supplementary\_Table\_2

**Supplementary Table 3: Association of clinical and tumor characteristics, *MLH1*, *MSH2*, *MSH3*, and *EXO1* single nucleotide polymorphism genotypes and *EXO1* haplotypes with survival of 90 head and neck squamous cell carcinoma patients treated with chemoradiotherapy**

| Variable                     | Univariate analysis                 |                |                    |                                     |                |                           |
|------------------------------|-------------------------------------|----------------|--------------------|-------------------------------------|----------------|---------------------------|
|                              | Event-free survival                 |                |                    | Overall survival                    |                |                           |
|                              | <i>N</i> with event/ <i>N</i> total | <i>P</i> value | HR (95% CI)        | <i>N</i> with event/ <i>N</i> total | <i>P</i> value | HR (95% CI)               |
| <b>Age (years)</b>           |                                     |                |                    |                                     |                |                           |
| ≤ 56                         | 33/46                               |                |                    | 32/46                               |                |                           |
| > 56                         | 29/44                               | 0.33           | 1.27 (0.77–2.10)   | 31/44                               | 0.86           | 1.04 (0.63–1.71)          |
| <b>Gender</b>                |                                     |                |                    |                                     |                |                           |
| Male                         | 56/83                               |                |                    | 59/83                               |                |                           |
| Female                       | 6/7                                 | 0.21           | 1.70 (0.73–3.96)   | 4/7                                 | 0.68           | 1.23 (0.44–3.42)          |
| <b>Tobacco consumption</b>   |                                     |                |                    |                                     |                |                           |
| Smokers                      | 60/88                               |                |                    | 62/88                               |                |                           |
| Nonsmokers                   | 2/2                                 | 0.12           | 3.05 (0.73–12.67)  | 1/2                                 | 0.73           | 1.40 (0.19–10.19)         |
| <b>Alcohol consumption</b>   |                                     |                |                    |                                     |                |                           |
| Drinkers                     | 59/83                               |                |                    | 60/83                               |                |                           |
| Abstainers                   | 3/7                                 | 0.31           | 1.82 (0.57–5.81)   | 3/7                                 | 0.16           | 2.30 (0.71–7.39)          |
| <b>Tumor location</b>        |                                     |                |                    |                                     |                |                           |
| Oral cavity/oropharynx       | 38/51                               |                |                    | 38/51                               |                |                           |
| Hypopharynx/larynx           | 24/39                               | 0.37           | 1.26 (0.75–2.10)   | 25/39                               | 0.36           | 1.26 (0.76–2.09)          |
| <b>Histological grade</b>    |                                     |                |                    |                                     |                |                           |
| Well/moderately              | 41/60                               |                |                    | 42/60                               |                |                           |
| Poorly/undifferentiated      | 9/13                                | 0.36           | 1.39 (0.67–2.89)   | 9/13                                | 0.60           | 1.20 (0.58–2.48)          |
| <b>Tumor stage</b>           |                                     |                |                    |                                     |                |                           |
| I + II                       | 1/6                                 |                |                    | 1/6                                 |                |                           |
| III + IV                     | 61/84                               | 0.05           | 7.09 (0.98–51.26)* | 62/84                               | 0.03           | 8.08<br>(1.11–58.49)***** |
| <b><i>MLH1</i> rs1800734</b> |                                     |                |                    |                                     |                |                           |
| GG+GA                        | 60/88                               |                |                    | 62/88                               |                |                           |
| AA                           | 2/2                                 | 0.30           | 2.09 (0.50–8.66)   | 1/2                                 | 0.81           | 1.26 (0.17–9.16)          |
| GG                           | 27/51                               |                |                    | 36/51                               |                |                           |
| GA+AA                        | 35/39                               | 0.62           | 1.13 (0.68–1.87)   | 27/39                               | 0.98           | 1.00 (0.60–1.65)          |
| <b><i>MSH2</i> rs2303426</b> |                                     |                |                    |                                     |                |                           |
| CC+CG                        | 46/71                               |                |                    | 49/71                               |                |                           |
| GG                           | 16/19                               | 0.81           | 1.07 (0.60–1.89)   | 14/19                               | 0.75           | 1.09 (0.61–1.95)          |
| CC                           | 14/22                               |                |                    | 15/22                               |                |                           |
| CG+GG                        | 48/68                               | 0.36           | 1.31 (0.72–2.38)   | 48/68                               | 0.64           | 1.15 (0.63–2.08)          |
| <b><i>MSH3</i> rs26279</b>   |                                     |                |                    |                                     |                |                           |
| GG+GA                        | 55/81                               |                |                    | 58/81                               |                |                           |
| AA                           | 7/9                                 | 0.51           | 1.30 (0.59–2.86)   | 5/9                                 | 0.35           | 1.54 (0.61–3.84)          |
| GG                           | 35/50                               |                |                    | 35/50                               |                |                           |
| GA+AA                        | 27/40                               | 0.87           | 1.04 (0.63–1.72)   | 28/40                               | 0.95           | 1.01 (0.61–1.67)          |
| <b><i>EXO1</i> rs1047840</b> |                                     |                |                    |                                     |                |                           |
| GG+GA                        | 57/82                               |                |                    | 57/82                               |                |                           |
| AA                           | 5/8                                 | 0.43           | 1.44 (0.57–3.60)   | 6/8                                 | 0.82           | 1.10 (0.47–2.56)          |
| GG                           | 31/40                               |                |                    | 29/40                               |                |                           |
| GA+AA                        | 31/50                               | 0.09           | 1.54 (0.93–2.53)** | 34/50                               | 0.54           | 1.16 (0.71–1.91)          |

**EXO1 rs9350**

|    |       |      |                  |       |      |                  |
|----|-------|------|------------------|-------|------|------------------|
| CC | 43/63 |      |                  | 42/63 |      |                  |
| CT | 19/27 | 0.63 | 1.14 (0.66–1.95) | 21/27 | 0.27 | 1.33 (0.79–2.25) |

**EXO1 + EXO1**

|                  |       |      |                         |       |      |                  |
|------------------|-------|------|-------------------------|-------|------|------------------|
| GT               | 18/24 |      |                         | 19/24 |      |                  |
| Other haplotypes | 44/66 | 0.26 | 1.36 (0.78–2.36)        | 44/66 | 0.15 | 1.47 (0.86–2.52) |
| AC               | 31/50 |      |                         | 34/50 |      |                  |
| Other haplotypes | 31/40 | 0.09 | 1.54<br>(0.93–2.53)**** | 29/40 | 0.54 | 1.16 (0.71–1.91) |

N: number of patients; HR: hazard ratio; CI: confidence interval; NE: not evaluated. Tumor stage was defined using the criteria of the American Joint Committee on Cancer. Results obtained in multivariate Cox analysis adjusted by tumor stage: \* $P = 0.045$ , HR: 7.03, 95% CI: 0.97–50.82; \*\* $P = 0.09$ , HR: 1.52, 95% CI: 0.92–2.52; \*\*\* $P = 0.19$ , HR: 1.67, 95% CI: 0.77–3.65; \*\*\*\* $P = 0.09$ , HR: 1.52, 95% CI: 0.92–2.52; \*\*\*\*\* $P = 0.03$ , HR: 8.08, 95% CI: 1.11–58.49.
